# Supplementary material for: Sleep-Body Composition Relationship: Roles of Sleep Behaviors in General and Abdominal Obesity in Chinese Adolescents Aged 17–22 Years
Source: MDPI journal article supplement (doi:10.3390/nu15194130), 2023-09-25
Supplement: s1 [file s1]

---

# **Sleep-body Composition Relationship: Roles of Sleep Behaviors in General and Abdominal Obesity in Chinese Adolescents Aged 17-22 years**

**Yalin Song, Lu Gong, Xiaomin Lou, Huijun Zhou, Yudan Hao, Qiuyuan Chen, Yize Zhao, Xili Jiang, Lijie Li  
and Xian Wang \***

| Table S1. Description of body composition parameters according to demographic characteristics of study population. |         |        |        |   |          |       |                |   |                    |       |        |       |       |       |                    |       |                          |       |
|--------------------------------------------------------------------------------------------------------------------|---------|--------|--------|---|----------|-------|----------------|---|--------------------|-------|--------|-------|-------|-------|--------------------|-------|--------------------------|-------|
| Variables                                                                                                          | Gender  |        | Race   |   | Location |       | The only child |   | Father's education |       |        |       |       |       | Mother's education |       | Self-rated family income |       |
|                                                                                                                    | t       | P      | t      | P | t        | P     | t              | P | F                  | P     | F      | P     | F     | P     |                    |       |                          |       |
| Visceral fat area (cm <sup>2</sup> )                                                                               | -5.468  | <0.001 |        |   | 0.803    | 0.422 |                |   | -0.768             | 0.443 | -1.648 | 0.100 | 4.765 | 0.001 | 3.189              | 0.013 | 1.460                    | 0.233 |
| Body mass index (kg/m <sup>2</sup> )                                                                               | 1.536   |        | 0.125  |   | 0.483    | 0.629 |                |   | 0.023              | 0.982 | -0.784 | 0.433 | 2.700 | 0.030 | 2.585              | 0.037 | 0.168                    | 0.846 |
| Waist to height ratio                                                                                              | -3.221  |        | 0.001  |   | 0.616    | 0.538 |                |   | 0.216              | 0.829 | -0.471 | 0.638 | 3.287 | 0.011 | 2.308              | 0.057 | 0.310                    | 0.734 |
| Waist to hip ratio                                                                                                 |         |        | 0.737  |   | 0.653    | 0.514 |                |   | -0.182             | 0.856 | -0.471 | 0.293 | 4.920 | 0.001 | 2.344              | 0.054 | 1.599                    | 0.203 |
| Fat mass index                                                                                                     | 0.337   |        | <0.001 |   | 0.667    | 0.505 |                |   | 0.104              | 0.917 | -1.052 | 0.605 | 3.182 | 0.014 | 2.117              | 0.078 | 0.532                    | 0.588 |
| Fat free mass index                                                                                                | -9.637  |        | <0.001 |   | -0.103   | 0.918 |                |   | 0.104              | 0.666 | -0.517 | 0.422 | 0.559 | 0.693 | 1.375              | 0.242 | 1.131                    | 0.324 |
| Body fat percentage (%)                                                                                            | 18.284  |        | <0.001 |   | 0.767    | 0.443 |                |   | -0.432             | 0.934 | -0.804 | 0.578 | 2.630 | 0.034 | 1.630              | 0.166 | 1.168                    | 0.312 |
|                                                                                                                    | -18.554 |        |        |   |          |       |                |   | 0.082              |       |        |       |       |       |                    |       |                          |       |
|                                                                                                                    |         |        |        |   |          |       |                |   |                    |       |        |       |       |       |                    |       |                          |       |
|                                                                                                                    |         |        |        |   |          |       |                |   |                    |       |        |       |       |       |                    |       |                          |       |
|                                                                                                                    |         |        |        |   |          |       |                |   |                    |       |        |       |       |       |                    |       |                          |       |
|                                                                                                                    |         |        |        |   |          |       |                |   |                    |       |        |       |       |       |                    |       |                          |       |
|                                                                                                                    |         |        |        |   |          |       |                |   |                    |       |        |       |       |       |                    |       |                          |       |
|                                                                                                                    |         |        |        |   |          |       |                |   |                    |       |        |       |       |       |                    |       |                          |       |
|                                                                                                                    |         |        |        |   |          |       |                |   |                    |       |        |       |       |       |                    |       |                          |       |
|                                                                                                                    |         |        |        |   |          |       |                |   |                    |       |        |       |       |       |                    |       |                          |       |
|                                                                                                                    |         |        |        |   |          |       |                |   |                    |       |        |       |       |       |                    |       |                          |       |
|                                                                                                                    |         |        |        |   |          |       |                |   |                    |       |        |       |       |       |                    |       |                          |       |
|                                                                                                                    |         |        |        |   |          |       |                |   |                    |       |        |       |       |       |                    |       |                          |       |
|                                                                                                                    |         |        |        |   |          |       |                |   |                    |       |        |       |       |       |                    |       |                          |       |
|                                                                                                                    |         |        |        |   |          |       |                |   |                    |       |        |       |       |       |                    |       |                          |       |
|                                                                                                                    |         |        |        |   |          |       |                |   |                    |       |        |       |       |       |                    |       |                          |       |
|                                                                                                                    |         |        |        |   |          |       |                |   |                    |       |        |       |       |       |                    |       |                          |       |
|                                                                                                                    |         |        |        |   |          |       |                |   |                    |       |        |       |       |       |                    |       |                          |       |
|                                                                                                                    |         |        |        |   |          |       |                |   |                    |       |        |       |       |       |                    |       |                          |       |
|                                                                                                                    |         |        |        |   |          |       |                |   |                    |       |        |       |       |       |                    |       |                          |       |
|                                                                                                                    |         |        |        |   |          |       |                |   |                    |       |        |       |       |       |                    |       |                          |       |
|                                                                                                                    |         |        |        |   |          |       |                |   |                    |       |        |       |       |       |                    |       |                          |       |
|                                                                                                                    |         |        |        |   |          |       |                |   |                    |       |        |       |       |       |                    |       |                          |       |
|                                                                                                                    |         |        |        |   |          |       |                |   |                    |       |        |       |       |       |                    |       |                          |       |
|                                                                                                                    |         |        |        |   |          |       |                |   |                    |       |        |       |       |       |                    |       |                          |       |
|                                                                                                                    |         |        |        |   |          |       |                |   |                    |       |        |       |       |       |                    |       |                          |       |
|                                                                                                                    |         |        |        |   |          |       |                |   |                    |       |        |       |       |       |                    |       |                          |       |
|                                                                                                                    |         |        |        |   |          |       |                |   |                    |       |        |       |       |       |                    |       |                          |       |
|                                                                                                                    |         |        |        |   |          |       |                |   |                    |       |        |       |       |       |                    |       |                          |       |
|                                                                                                                    |         |        |        |   |          |       |                |   |                    |       |        |       |       |       |                    |       |                          |       |
|                                                                                                                    |         |        |        |   |          |       |                |   |                    |       |        |       |       |       |                    |       |                          |       |
|                                                                                                                    |         |        |        |   |          |       |                |   |                    |       |        |       |       |       |                    |       |                          |       |
|                                                                                                                    |         |        |        |   |          |       |                |   |                    |       |        |       |       |       |                    |       |                          |       |
|                                                                                                                    |         |        |        |   |          |       |                |   |                    |       |        |       |       |       |                    |       |                          |       |
|                                                                                                                    |         |        |        |   |          |       |                |   |                    |       |        |       |       |       |                    |       |                          |       |
|                                                                                                                    |         |        |        |   |          |       |                |   |                    |       |        |       |       |       |                    |       |                          |       |
|                                                                                                                    |         |        |        |   |          |       |                |   |                    |       |        |       |       |       |                    |       |                          |       |
|                                                                                                                    |         |        |        |   |          |       |                |   |                    |       |        |       |       |       |                    |       |                          |       |
|                                                                                                                    |         |        |        |   |          |       |                |   |                    |       |        |       |       |       |                    |       |                          |       |
|                                                                                                                    |         |        |        |   |          |       |                |   |                    |       |        |       |       |       |                    |       |                          |       |
|                                                                                                                    |         |        |        |   |          |       |                |   |                    |       |        |       |       |       |                    |       |                          |       |
|                                                                                                                    |         |        |        |   |          |       |                |   |                    |       |        |       |       |       |                    |       |                          |       |
|                                                                                                                    |         |        |        |   |          |       |                |   |                    |       |        |       |       |       |                    |       |                          |       |
|                                                                                                                    |         |        |        |   |          |       |                |   |                    |       |        |       |       |       |                    |       |                          |       |
|                                                                                                                    |         |        |        |   |          |       |                |   |                    |       |        |       |       |       |                    |       |                          |       |
|                                                                                                                    |         |        |        |   |          |       |                |   |                    |       |        |       |       |       |                    |       |                          |       |
|                                                                                                                    |         |        |        |   |          |       |                |   |                    |       |        |       |       |       |                    |       |                          |       |
|                                                                                                                    |         |        |        |   |          |       |                |   |                    |       |        |       |       |       |                    |       |                          |       |
|                                                                                                                    |         |        |        |   |          |       |                |   |                    |       |        |       |       |       |                    |       |                          |       |
|                                                                                                                    |         |        |        |   |          |       |                |   |                    |       |        |       |       |       |                    |       |                          |       |
|                                                                                                                    |         |        |        |   |          |       |                |   |                    |       |        |       |       |       |                    |       |                          |       |
|                                                                                                                    |         |        |        |   |          |       |                |   |                    |       |        |       |       |       |                    |       |                          |       |
|                                                                                                                    |         |        |        |   |          |       |                |   |                    |       |        |       |       |       |                    |       |                          |       |
|                                                                                                                    |         |        |        |   |          |       |                |   |                    |       |        |       |       |       |                    |       |                          |       |
|                                                                                                                    |         |        |        |   |          |       |                |   |                    |       |        |       |       |       |                    |       |                          |       |
|                                                                                                                    |         |        |        |   |          |       |                |   |                    |       |        |       |       |       |                    |       |                          |       |
|                                                                                                                    |         |        |        |   |          |       |                |   |                    |       |        |       |       |       |                    |       |                          |       |
|                                                                                                                    |         |        |        |   |          |       |                |   |                    |       |        |       |       |       |                    |       |                          |       |
|                                                                                                                    |         |        |        |   |          |       |                |   |                    |       |        |       |       |       |                    |       |                          |       |
|                                                                                                                    |         |        |        |   |          |       |                |   |                    |       |        |       |       |       |                    |       |                          |       |
|                                                                                                                    |         |        |        |   |          |       |                |   |                    |       |        |       |       |       |                    |       |                          |       |
|                                                                                                                    |         |        |        |   |          |       |                |   |                    |       |        |       |       |       |                    |       |                          |       |
|                                                                                                                    |         |        |        |   |          |       |                |   |                    |       |        |       |       |       |                    |       |                          |       |
|                                                                                                                    |         |        |        |   |          |       |                |   |                    |       |        |       |       |       |                    |       |                          |       |
|                                                                                                                    |         |        |        |   |          |       |                |   |                    |       |        |       |       |       |                    |       |                          |       |

Tests for difference were performed by using unpaired *t*-test and univariate one-way ANOVAs. Bold: *p*<0.05.

**Table S2.** Description of body composition parameters according to takeaway food consumption, breakfast consumption, vegetables consumption, fruits consumption and dried fruits consumption of study population.

| Variables               | Takeaway food consumption/week |   |   |       |   | Breakfast consumption/week |        |   |              |   | Vegetables consumption/d |       | Fruits consumption/d |        | Dry fruits consumption/d |       |
|-------------------------|--------------------------------|---|---|-------|---|----------------------------|--------|---|--------------|---|--------------------------|-------|----------------------|--------|--------------------------|-------|
|                         |                                |   |   |       |   |                            |        |   |              |   |                          |       |                      |        |                          |       |
|                         | F                              | P | t | P     | t | P                          | F      | P | F            | P |                          |       |                      |        |                          |       |
| Visceral fat area (cm²) | 0.548                          |   |   | 0.584 |   |                            | -2.397 |   | <b>0.017</b> |   | 0.084                    | 0.933 | -0.178               | 0.859  | 0.832                    | 0.406 |
| Body mass index (kg/m²) | 1.258                          |   |   | 0.209 |   |                            | -1.218 |   | 0.224        |   | -0.187                   | 0.852 | 1.572                | 0.117  | 0.846                    | 0.398 |
| Waist to height ratio   | 0.576                          |   |   | 0.565 |   |                            | -1.251 |   | 0.211        |   | 0.445                    | 0.657 | 0.765                | 0.445  | 0.668                    | 0.505 |
| Waist to hip ratio      | -1.137                         |   |   | 0.256 |   |                            | -1.251 |   | 0.840        |   | 0.591                    | 0.555 | 0.559                | 0.576  | 0.508                    | 0.612 |
| Fat mass index          | 1.228                          |   |   | 0.220 |   |                            | -0.203 |   | <b>0.021</b> |   | 0.353                    | 0.724 | -0.426               | 0.670  | 0.910                    | 0.363 |
| Fat free mass index     | 0.453                          |   |   | 0.651 |   |                            | -2.324 |   | 0.415        |   | -0.726                   | 0.468 | <b>0. 001</b>        | -0.087 | 0.931                    |       |
| Body fat percentage (%) | 1.195                          |   |   | 0.233 |   |                            | 0.816  |   | <b>0.010</b> |   | 0.808                    | 0.420 | 3.357                | 0.143  | 0.946                    | 0.345 |
|                         |                                |   |   |       |   |                            | -2.589 |   |              |   |                          |       | -1.466               |        |                          |       |

Tests for difference were performed by using unpaired *t*-test and univariate one-way ANOVAs. Bold: *p*<0.05.

**Table S3.** Description of body composition parameters according to pure juice consumption, soft drinks consumption and sugar-sweetened beverage consumption of study population.

| Variables                            | Pure juice consumption<br>(>250ml)/d |   | Soft drinks consumption<br>(≥250ml)/week |   | Sugar-sweetened beverage<br>Consumption<br>(≥250ml)/week |              |
|--------------------------------------|--------------------------------------|---|------------------------------------------|---|----------------------------------------------------------|--------------|
|                                      | F                                    | P | F                                        | P | F                                                        | P            |
| Visceral fat area (cm <sup>2</sup> ) | 0.535                                |   | 0.593                                    |   | 1.322                                                    | 0.187        |
| Body mass index (kg/m <sup>2</sup> ) | -0.315                               |   | 0.753                                    |   | -0.013                                                   | 0.989        |
| Waist to height ratio                | 0.901                                |   | 0.368                                    |   | 0.375                                                    | 0.708        |
| Waist to hip ratio                   | 0.550                                |   | 0.582                                    |   | 0.488                                                    | 0.052        |
| Fat mass index                       | 1.381                                |   | 0.168                                    |   | 2.038                                                    | <b>0.042</b> |
| Fat free mass index                  | -2.356                               |   | <b>0.019</b>                             |   | <b>0.002</b>                                             | 0.752        |
| Body fat percentage (%)              | 2.172                                |   | <b>0.030</b>                             |   | <b>0.004</b>                                             | 1.022        |
|                                      |                                      |   |                                          |   | 2.927                                                    | 0.307        |

Tests for difference were performed by using univariate one-way ANOVAs. Bold:  $p < 0.05$ .

**Table S4.** Description of body composition parameters according to weekday screen time and weekend screen time of study population.

| Variables                            | Weekday screen time/d |   | Weekend screen time/d |   |
|--------------------------------------|-----------------------|---|-----------------------|---|
|                                      | F                     | P | F                     | P |
| Visceral fat area (cm <sup>2</sup> ) | 0.268                 |   | 0.789                 |   |
| Body mass index (kg/m <sup>2</sup> ) | 0.615                 |   | 0.539                 |   |
| Waist to height ratio                | 0.400                 |   | 0.689                 |   |
| Waist to hip ratio                   | -0.363                |   | 0.717                 |   |
| Fat mass index                       | 0.312                 |   | 0.755                 |   |
| Fat free mass index                  | 0.918                 |   | 0.360                 |   |
| Body fat percentage (%)              | 0.380                 |   | 0.704                 |   |
|                                      |                       |   | -0.573                |   |

Tests for difference were performed by using univariate one-way ANOVAs.

**Table S5.** Description of body composition parameters according to duration of physical exercise each time and number of physical exercise of study population.

| Variables                            | Duration of physical exercise each time |   | Number of physical exercise/d |   |
|--------------------------------------|-----------------------------------------|---|-------------------------------|---|
|                                      | t                                       | P | t                             | P |
| Visceral fat area (cm <sup>2</sup> ) | -0.671                                  |   | 0.507                         |   |
| Body mass index (kg/m <sup>2</sup> ) | -2.014                                  |   | <b>0.045</b>                  |   |
| Waist to height ratio                | -0.959                                  |   | 0.338                         |   |
| Waist to hip ratio                   | -1.600                                  |   | 0.119                         |   |
| Fat mass index                       | 0.467                                   |   | 0.640                         |   |
| Fat free mass index                  | -4.324                                  |   | <b>&lt;0.001</b>              |   |
| Body fat percentage (%)              | 1.903                                   |   | 0.058                         |   |
|                                      |                                         |   | -1.393                        |   |
|                                      |                                         |   | -0.818                        |   |
|                                      |                                         |   | -0.986                        |   |
|                                      |                                         |   | -0.201                        |   |
|                                      |                                         |   | -1.574                        |   |
|                                      |                                         |   | 0.525                         |   |
|                                      |                                         |   | -1.910                        |   |

Tests for difference were performed by using unpaired *t*-test. Bold:  $p < 0.05$ .

**Table S6.** Description of body composition parameters according to alcohol consumption and smoking of study population.

| Variables                            | Alcohol consumption Smoking |          |                  |              |
|--------------------------------------|-----------------------------|----------|------------------|--------------|
|                                      | <i>t</i>                    | <i>P</i> | <i>t</i>         | <i>P</i>     |
| Visceral fat area (cm <sup>2</sup> ) | 1.196                       |          | 0.233            | <b>0.040</b> |
| Body mass index (kg/m <sup>2</sup> ) | -0.628                      |          | 0.530            | 0.926        |
| Waist to height ratio                | 0.515                       |          | 0.607            | 0.143        |
| Waist to hip ratio                   | -0.777                      |          | 0.438            | 0.107        |
| Fat mass index                       | 2.073                       |          | <b>0.039</b>     | <b>0.027</b> |
| Fat free mass index                  | -4.037                      |          | <b>&lt;0.001</b> | <b>0.005</b> |
| Body fat percentage (%)              | 3.372                       |          | <b>0.001</b>     | <b>0.002</b> |

Tests for difference were performed by using unpaired *t*-test. Bold: *p*<0.05.
